# Supplementary material for: Metabolic Variation during Development in Culture of Leishmania donovani Promastigotes
Source: PubMed Central journal article supplement (PMC3243725; doi:10.1371/journal.pntd.0001451), 2011-12-20

Figure S5

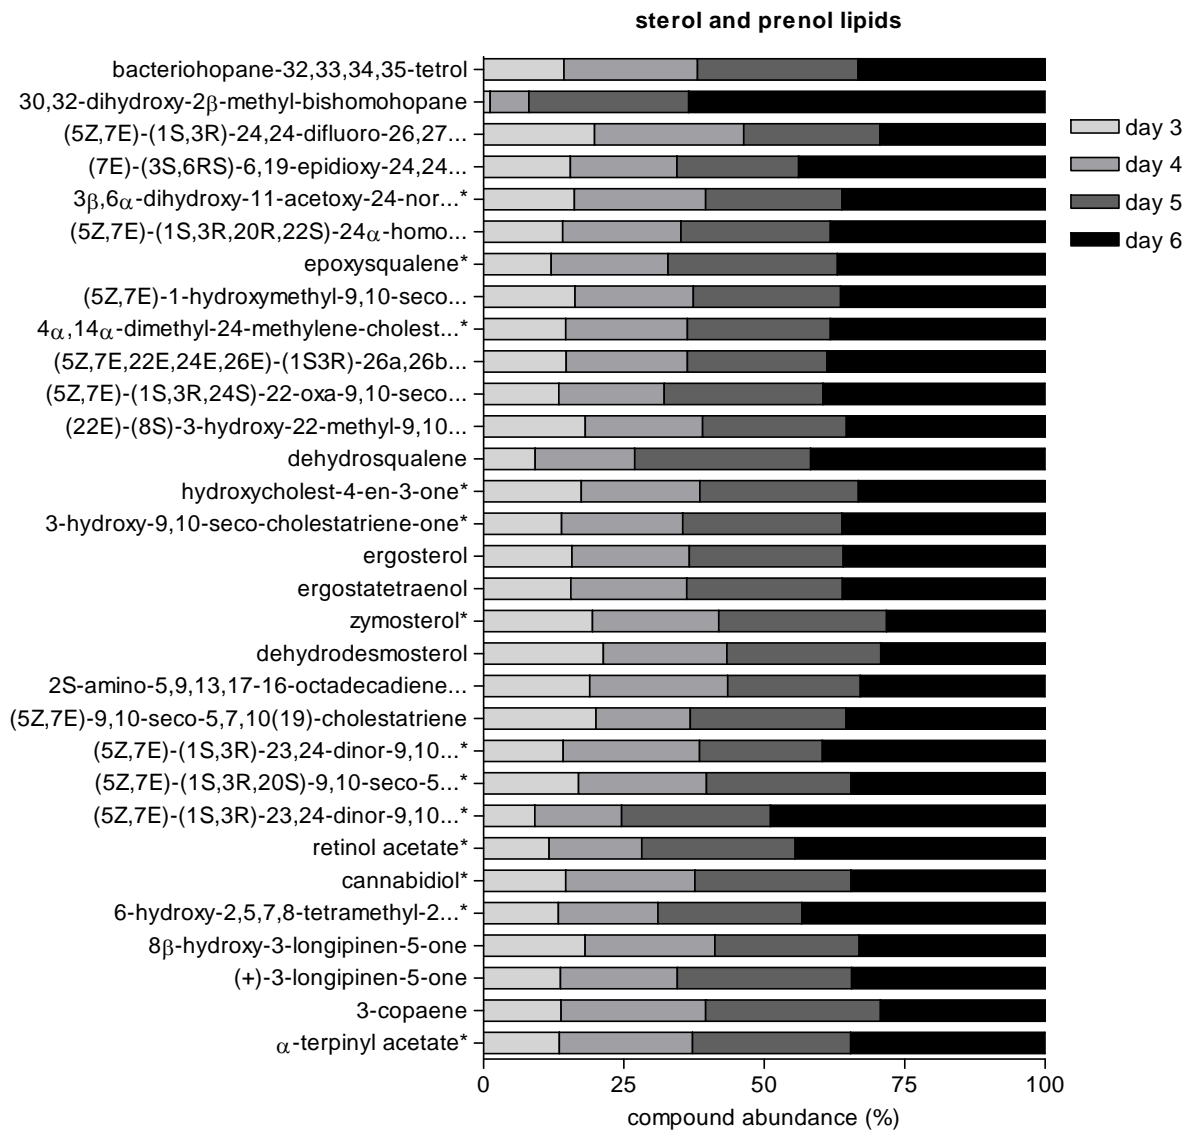

Supplement: pntd.0001451.s005.pdf [file pntd.0001451.s005.pdf]
