# Supplementary material for: Metabolic Variation during Development in Culture of Leishmania donovani Promastigotes
Source: PubMed Central journal article supplement (PMC3243725; doi:10.1371/journal.pntd.0001451), 2011-12-20
Supplement: pntd.0001451.s014.pdf [file pntd.0001451.s014.pdf]

**Table S3**

|                                                  | Average intensity per 25µg cell protein |          |          |          | pattern |
|--------------------------------------------------|-----------------------------------------|----------|----------|----------|---------|
|                                                  | day 3                                   | day 4    | day 5    | day 6    |         |
| <b>amines</b>                                    |                                         |          |          |          |         |
| N-acetylputrescine                               | 2.53E+05                                | 3.69E+05 | 1.42E+06 | 2.42E+05 | 2       |
| <b>amino acids and amino acids conjugates</b>    |                                         |          |          |          |         |
| proline                                          | 2.95E+08                                | 3.07E+08 | 2.45E+08 | 1.10E+08 | 2       |
| 2-amino-3-oxobutanoic acid*                      | 2.29E+05                                | 3.69E+05 | 5.77E+05 | 6.99E+05 | 1       |
| glutamate-semialdehyde                           | 1.36E+07                                | 1.09E+07 | 8.36E+06 | 1.89E+06 | 3       |
| homocysteine                                     | 2.56E+05                                | 2.26E+05 | 1.18E+05 | 7.34E+04 | 3       |
| N-butyrylglycine                                 | 1.28E+05                                | 4.13E+05 | 1.11E+06 | 5.04E+06 | 1       |
| lysine                                           | 5.54E+06                                | 1.31E+07 | 2.01E+07 | 2.75E+07 | 1       |
| tiglylglycine*                                   | 7.76E+04                                | 1.70E+05 | 2.41E+05 | 6.00E+05 | 1       |
| valerylglycine                                   | 1.64E+05                                | 7.21E+05 | 2.16E+06 | 8.90E+06 | 1       |
| carnitine                                        | 1.89E+06                                | 1.16E+06 | 7.44E+05 | 4.24E+05 | 3       |
| N-acetylleucine*                                 | 8.48E+04                                | 1.97E+05 | 3.19E+05 | 6.26E+05 | 1       |
| acetyl-lysine*                                   | 1.37E+05                                | 2.11E+05 | 3.01E+05 | 9.75E+05 | 1       |
| N-acetyl-arginine                                | 7.16E+04                                | 9.36E+04 | 2.82E+05 | 6.45E+05 | 1       |
| cystathionine                                    | 7.54E+07                                | 6.69E+07 | 3.76E+07 | 2.15E+07 | 3       |
| prolylhydroxyproline                             | 3.64E+06                                | 9.33E+05 | 4.89E+05 | 4.28E+05 | 3       |
| malonylcarnitine                                 | 3.10E+05                                | 3.29E+05 | 3.02E+05 | 1.33E+05 | 2       |
| aspartyl-aspartic acid                           | 2.44E+05                                | 4.27E+05 | 6.60E+05 | 1.08E+06 | 1       |
| aspartyl-phenylalanine                           | 1.20E+07                                | 9.04E+06 | 5.29E+06 | 3.64E+06 | 3       |
| glutathione disulfide                            | 4.47E+04                                | 5.03E+04 | 7.74E+04 | 1.74E+05 | 1       |
| trypanothione                                    | 1.32E+06                                | 1.25E+06 | 2.09E+06 | 2.55E+05 | 2       |
| <b>carbohydrates and carbohydrate conjugates</b> |                                         |          |          |          |         |
| trehalose*                                       | 4.18E+04                                | 5.29E+04 | 1.18E+05 | 1.87E+05 | 1       |
| maltotriose                                      | 1.30E+05                                | 2.21E+05 | 4.06E+05 | 8.18E+05 | 1       |
| maltotetraose*                                   | 2.15E+05                                | 3.97E+05 | 7.31E+05 | 1.50E+06 | 1       |
| maltopentaose*                                   | 5.27E+05                                | 9.24E+05 | 1.61E+06 | 3.84E+06 | 1       |
| maltohexaose                                     | 7.40E+04                                | 1.46E+05 | 2.78E+05 | 5.75E+05 | 1       |
| <b>fatty acyls</b>                               |                                         |          |          |          |         |
| 10-pentadecenal                                  | 8.05E+05                                | 1.99E+06 | 3.95E+06 | 5.07E+06 | 1       |
| 9, 12, 15-octadecatrienal*                       | 4.12E+05                                | 7.24E+05 | 7.89E+05 | 1.40E+06 | 1       |
| aminohexadecanoic acid                           | 1.24E+06                                | 3.28E+06 | 4.95E+06 | 6.42E+06 | 1       |
| alpha/gamma-linolenic acid                       | 3.69E+05                                | 5.26E+05 | 8.29E+05 | 1.23E+06 | 1       |
| linoleic acid                                    | 4.13E+05                                | 6.35E+05 | 8.33E+05 | 1.42E+06 | 1       |
| N-(11Z, 14Z-eicosadienyl)-ethanolamine           | 1.25E+06                                | 2.24E+06 | 3.32E+05 | 1.66E+06 | 5       |
| N-(11Z-eicosaenyl)-ethanolamine                  | 4.26E+05                                | 6.65E+05 | 1.71E+05 | 5.46E+05 | 5       |
| <b>glycerolipids</b>                             |                                         |          |          |          |         |
| DAG(36:5)                                        | 2.75E+05                                | 6.27E+05 | 9.69E+05 | 1.49E+06 | 1       |
| DAG(36:4)                                        | 2.41E+05                                | 6.16E+05 | 1.10E+06 | 2.08E+06 | 1       |
| DAG(36:3)                                        | 2.01E+05                                | 4.02E+05 | 6.79E+05 | 1.24E+06 | 1       |
| DAG(42:3)*                                       | 2.07E+05                                | 1.87E+05 | 2.28E+05 | 3.74E+06 | 4       |
| DAG(46:7)                                        | 1.18E+06                                | 3.49E+06 | 5.64E+06 | 7.39E+06 | 1       |
| TAG(54:7)                                        | 9.96E+04                                | 1.76E+05 | 2.99E+05 | 5.63E+05 | 1       |
| TAG(54:6)                                        | 9.75E+04                                | 2.42E+05 | 2.75E+05 | 5.33E+05 | 1       |
| TAG(54:5)                                        | 1.05E+05                                | 1.34E+05 | 2.41E+05 | 4.09E+05 | 1       |

## Average intensity per 25µg cell protein

|                                              | day 3    | day 4    | day 5    | day 6    | pattern |
|----------------------------------------------|----------|----------|----------|----------|---------|
| <b>glycerophospholipids</b>                  |          |          |          |          |         |
| GPC(14:1)                                    | 1.63E+05 | 3.07E+05 | 3.41E+05 | 5.07E+05 | 1       |
| lysoPE(18:2/1)                               | 5.44E+05 | 1.00E+06 | 1.29E+06 | 2.60E+06 | 1       |
| GPE(18:1/1)                                  | 4.08E+05 | 6.25E+05 | 8.82E+05 | 1.96E+06 | 1       |
| GPP(20:0/2)                                  | 1.08E+05 | 2.45E+05 | 1.83E+05 | 3.76E+05 | 5       |
| GPC(17:0/1)                                  | 1.35E+05 | 2.05E+05 | 3.70E+05 | 8.45E+05 | 1       |
| GPC(18:3/1)                                  | 1.80E+06 | 3.66E+06 | 4.16E+06 | 7.79E+06 | 1       |
| GPC(18:2/-1)                                 | 2.57E+06 | 9.45E+06 | 1.41E+07 | 3.00E+07 | 1       |
| GPC(18:1/-1)                                 | 1.03E+06 | 1.96E+06 | 4.49E+06 | 1.22E+07 | 1       |
| GPC(18:0/1)                                  | 2.37E+06 | 3.32E+06 | 5.71E+06 | 1.58E+07 | 1       |
| lysoPC(20:3/1)                               | 4.60E+05 | 9.64E+05 | 1.44E+06 | 2.59E+06 | 1       |
| lysoPC (20:2/1)                              | 2.17E+05 | 8.20E+05 | 1.52E+06 | 3.65E+06 | 1       |
| GPC(22:5/1)                                  | 1.60E+06 | 2.76E+06 | 3.20E+06 | 5.78E+06 | 1       |
| GPI(18:1/1)                                  | 7.03E+05 | 1.28E+06 | 2.15E+06 | 6.64E+06 | 1       |
| GPC(32:3/1)                                  | 5.42E+06 | 1.17E+07 | 1.58E+07 | 2.41E+07 | 1       |
| GPC(32:1//1)*                                | 7.21E+06 | 1.48E+07 | 1.86E+07 | 2.55E+07 | 1       |
| GPC(32:4/2)*                                 | 7.73E+06 | 2.72E+06 | 1.47E+06 | 8.56E+05 | 3       |
| GPC(34:3/1)*                                 | 1.94E+06 | 3.61E+06 | 5.38E+06 | 9.75E+06 | 1       |
| GPC(34:1)*                                   | 1.81E+06 | 4.36E+06 | 6.10E+06 | 9.81E+06 | 1       |
| GPS(34:1/2)                                  | 4.93E+04 | 9.19E+04 | 1.56E+05 | 2.73E+05 | 1       |
| GPC(36:3/1)                                  | 8.31E+05 | 1.36E+06 | 2.05E+06 | 3.16E+06 | 1       |
| DMGPE(36:2/2)*                               | 3.04E+06 | 7.00E+06 | 1.02E+07 | 1.38E+07 | 1       |
| GPE(38:1/2)*                                 | 7.82E+05 | 1.12E+06 | 1.93E+06 | 2.91E+06 | 1       |
| GPC(36:7/2)                                  | 1.77E+07 | 8.26E+06 | 3.54E+06 | 1.61E+06 | 3       |
| GPC(36:2/2)                                  | 3.92E+07 | 8.97E+07 | 1.31E+08 | 1.80E+08 | 1       |
| GPC(36:1/2)                                  | 7.42E+06 | 1.42E+07 | 2.57E+07 | 4.08E+07 | 1       |
| GPC(37:2/2)*                                 | 4.74E+05 | 1.07E+06 | 1.59E+06 | 2.52E+06 | 1       |
| GPT(36:1/2)                                  | 1.11E+06 | 2.89E+06 | 2.61E+06 | 3.58E+06 | 5       |
| GPC(38:2/2)                                  | 1.46E+06 | 3.34E+06 | 6.01E+06 | 9.48E+06 | 1       |
| GPC(40:10/2)                                 | 1.61E+07 | 6.25E+06 | 2.41E+06 | 1.31E+06 | 3       |
| GPC(42:3)                                    | 2.29E+05 | 3.68E+05 | 5.41E+05 | 7.63E+05 | 1       |
| GPC(42:0/2)                                  | 1.61E+05 | 7.04E+04 | 1.37E+05 | 2.74E+05 | 4       |
| GPC(44:2/2)                                  | 3.37E+05 | 1.17E+06 | 1.90E+06 | 2.36E+06 | 1       |
| GPC(46:2/2)                                  | 8.51E+04 | 1.72E+05 | 3.58E+05 | 4.09E+05 | 1       |
| <b>heterocyclic molecules</b>                |          |          |          |          |         |
| indolelactate                                | 2.40E+05 | 4.93E+05 | 9.25E+05 | 1.08E+06 | 1       |
| dihydrobiopterin                             | 1.61E+06 | 4.21E+06 | 1.46E+07 | 2.49E+06 | 2       |
| <b>ketones and aldehydes</b>                 |          |          |          |          |         |
| aminoacetone*                                | 6.33E+05 | 1.66E+06 | 2.54E+06 | 4.79E+06 | 1       |
| <b>nucleosides and nucleoside conjugates</b> |          |          |          |          |         |
| cytosine                                     | 4.23E+05 | 6.16E+05 | 1.04E+06 | 2.74E+05 | 2       |
| hypoxanthine                                 | 1.97E+05 | 4.06E+05 | 8.04E+06 | 3.92E+07 | 1       |
| deoxycytidine                                | 2.58E+05 | 5.26E+05 | 6.69E+05 | 1.37E+05 | 2       |
| <b>others</b>                                |          |          |          |          |         |
| diphosphate                                  | 2.29E+05 | 8.11E+05 | 8.09E+05 | 6.86E+05 | 2       |
| N-methylpelletierine                         | 6.41E+04 | 1.19E+05 | 2.23E+05 | 8.01E+05 | 1       |

|                                               | Average intensity per 25µg cell protein |          |          |          | pattern |
|-----------------------------------------------|-----------------------------------------|----------|----------|----------|---------|
|                                               | day 3                                   | day 4    | day 5    | day 6    |         |
| <b>sphingolipids and sphingoid bases</b>      |                                         |          |          |          |         |
| 1-deoxy-sphinganine                           | 7.66E+05                                | 1.78E+06 | 2.56E+06 | 4.22E+06 | 1       |
| heptadecasphinganine                          | 2.03E+05                                | 3.77E+05 | 6.85E+05 | 1.59E+06 | 1       |
| dehydrosphinganine                            | 5.47E+05                                | 1.62E+06 | 2.57E+06 | 3.41E+06 | 1       |
| SP(2-amino-14, 16-dimethyloctadecan-3-ol)     | 1.97E+05                                | 3.43E+05 | 5.10E+05 | 7.92E+05 | 1       |
| 4-hydroxysphinganine                          | 1.54E+05                                | 4.09E+05 | 5.08E+05 | 5.61E+05 | 1       |
| N, N-dimethylsphing-4-enine                   | 1.66E+05                                | 4.56E+05 | 3.60E+05 | 6.02E+05 | 5       |
| SP(2S-dimethylaminooctadecane-1, 3R-diol)     | 9.15E+05                                | 1.77E+06 | 2.59E+06 | 3.07E+06 | 1       |
| N-(hexadecanoyl)-sphing-4-enine               | 4.60E+06                                | 1.08E+07 | 2.28E+07 | 4.17E+07 | 1       |
| N-(hexadecanoyl)-4S-hydroxysphinganine        | 1.99E+06                                | 6.10E+06 | 1.36E+07 | 2.24E+07 | 1       |
| N-(octadecanoyl)-sphing-4-enine               | 1.41E+05                                | 4.74E+05 | 1.46E+06 | 2.87E+06 | 1       |
| <b>sterol and prenol lipids</b>               |                                         |          |          |          |         |
| retinol acetate*                              | 3.05E+05                                | 4.31E+05 | 7.13E+05 | 1.16E+06 | 1       |
| (5Z, 7E)-(1S, 3R)-23, 24-dinor-9, 10-seco...* | 2.00E+05                                | 3.37E+05 | 5.79E+05 | 1.07E+06 | 1       |
| dehydrosqualene                               | 4.84E+05                                | 9.31E+05 | 1.65E+06 | 2.19E+06 | 1       |
| epoxysqualene*                                | 2.21E+05                                | 3.80E+05 | 5.52E+05 | 6.77E+05 | 1       |
| 30,32-dihydroxy-2b-methyl-bishomohopane       | 1.40E+05                                | 8.12E+05 | 3.36E+06 | 7.48E+06 | 1       |
| <b>vitamins and cofactors</b>                 |                                         |          |          |          |         |
| 5-methyl-THF                                  | 1.31E+05                                | 4.47E+05 | 5.24E+05 | 1.49E+05 | 2       |
